# Supplementary material
Source: Elsevier journal article supplement (https://comptes-rendus.academie-sciences.fr/geoscience/article/10.1016/j.crte.2019.07.003/file/attach/mmc2.pdf)

## Appendix B (Images of the Pavin pumice).

**B1.** SEM image showing the main phenocryst assemblage of the Pavin pumice;

**B2.** Amphibole containing biotite, apatite, and ilmenite as mineral inclusions;

**B3.** Clinopyroxene;

*Plag* for plagioclase, *Am* for amphibole, *Mt* for magnetite, *Ilm* for ilmenite, *Ap* for apatite.

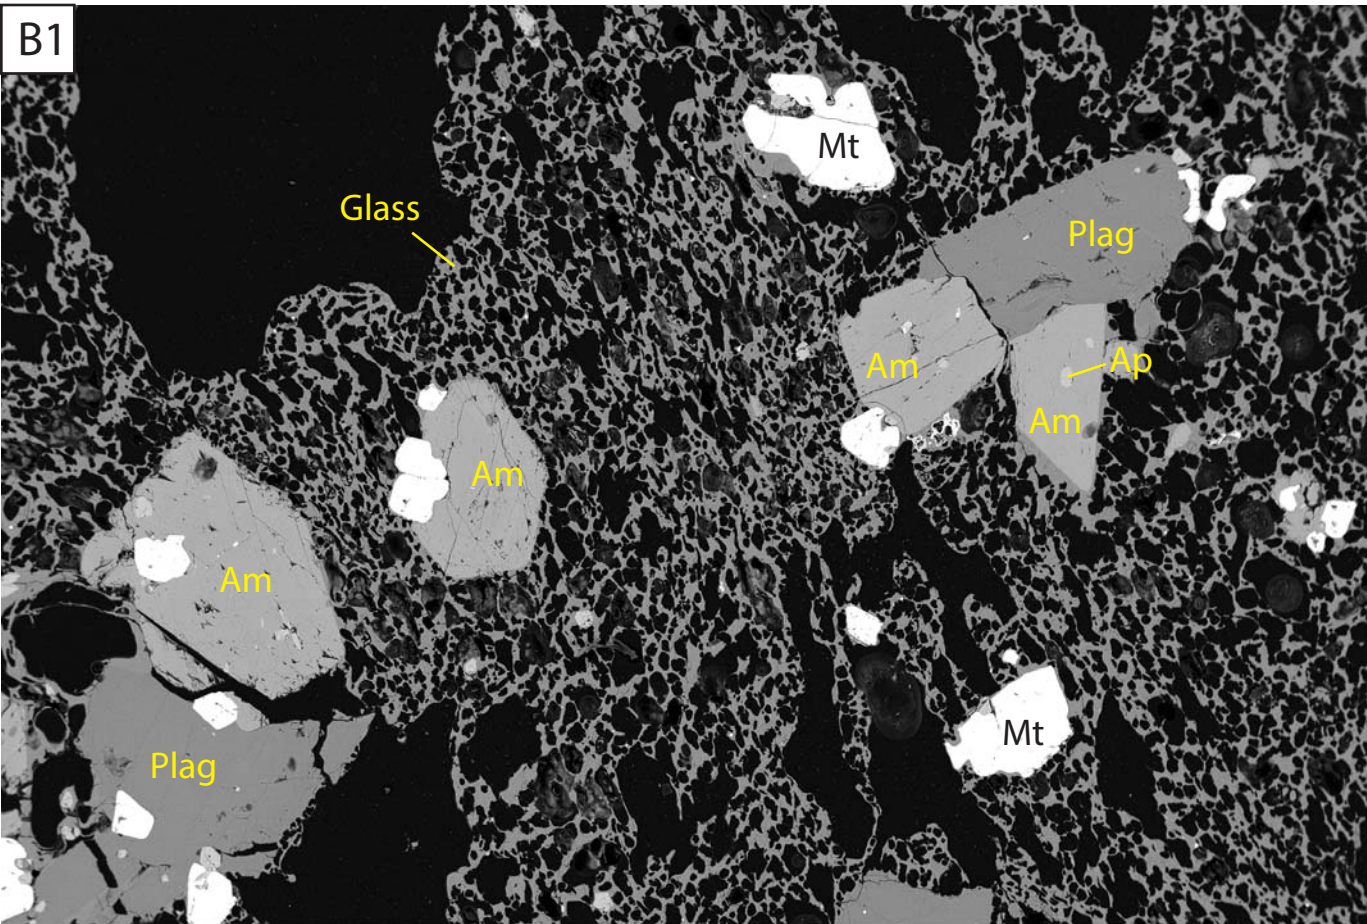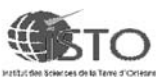

200  $\mu\text{m}$

EHT = 15.00 kV  
Mag = 35 X

Signal A = BSD4 A  
WD = 10.0 mm

Width = 3.267 mm

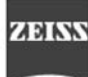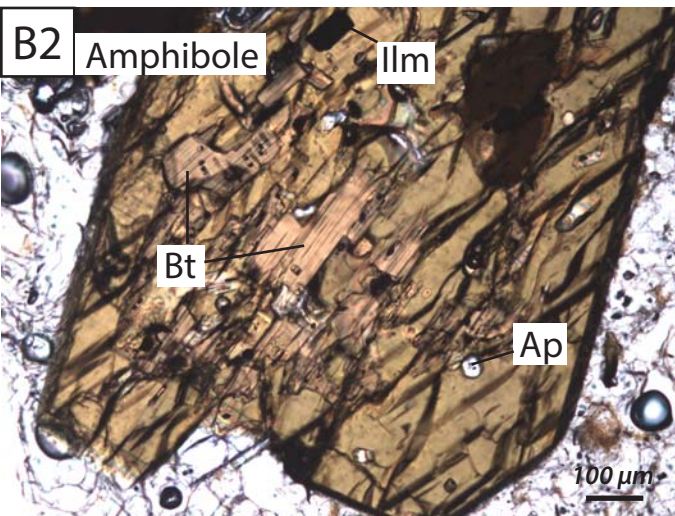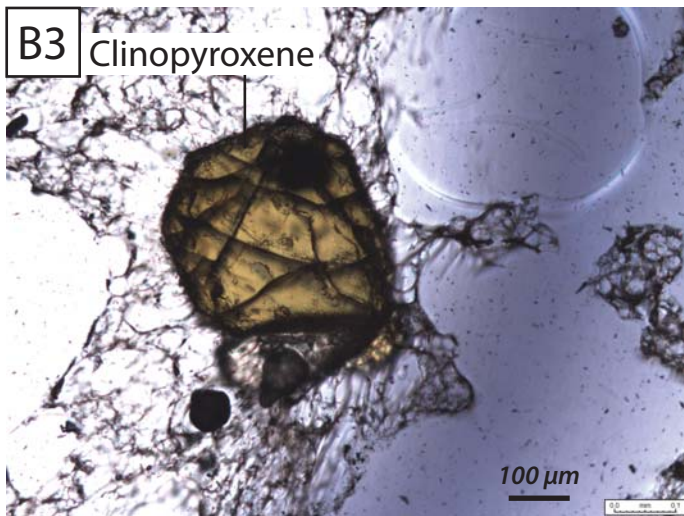

Supplement: mmc2 [file mmc2.pdf]
